# Supplementary material for: Exposure to a PFOA, PFOS and PFHxS Mixture during Gestation and Lactation Alters the Liver Proteome in Offspring of CD-1 Mice
Source: MDPI journal article supplement (doi:10.3390/toxics12050348), 2024-05-09
Supplement: s1 [file s1]

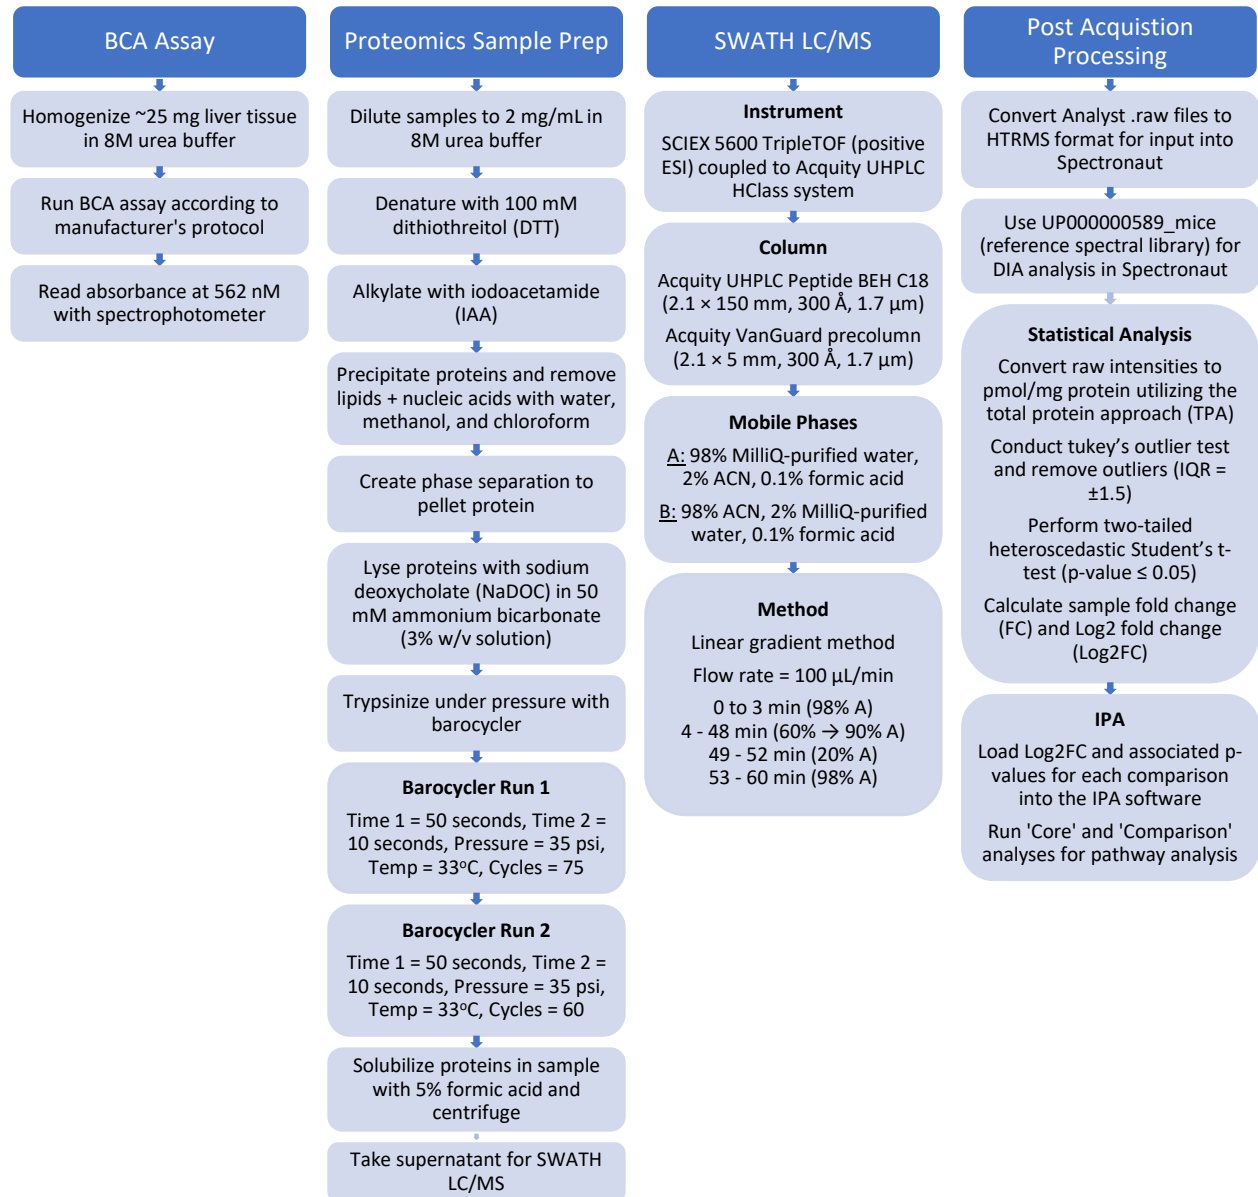

**Figure S1. Proteomic sample preparation workflow.** A simplified procedural workflow for proteomic sample preparation is visualized to help follow detailed methodology.

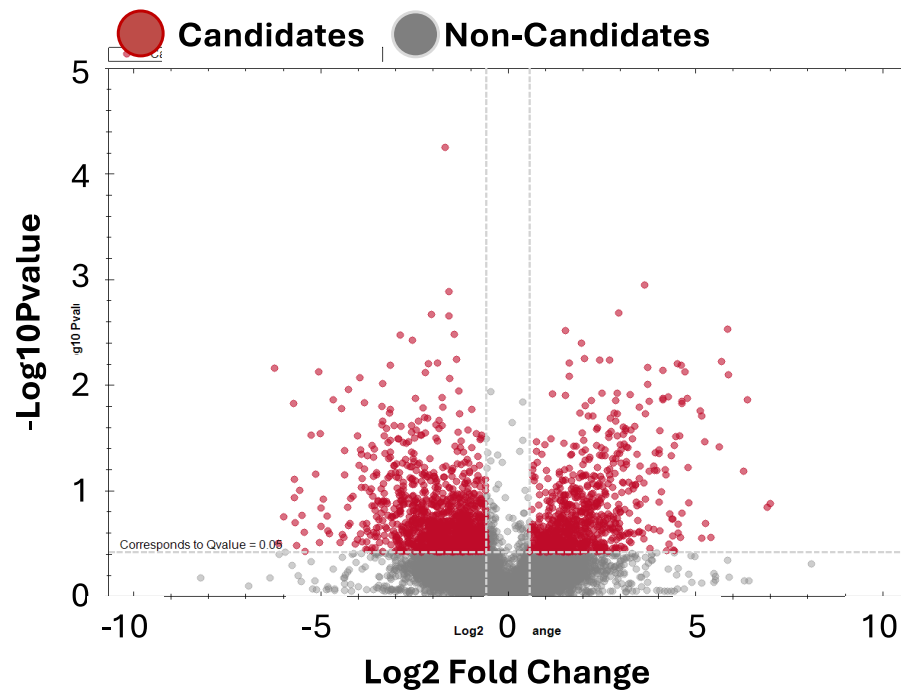

**Figure S2. PFOA, PFOS, PFHxS, and PFAS Mix altered protein expression in offspring liver.** There were 1,818 significantly altered proteins ( $p\text{-val} < 0.05$ ). 152 proteins were had increased expression and 123 had decreased expression.

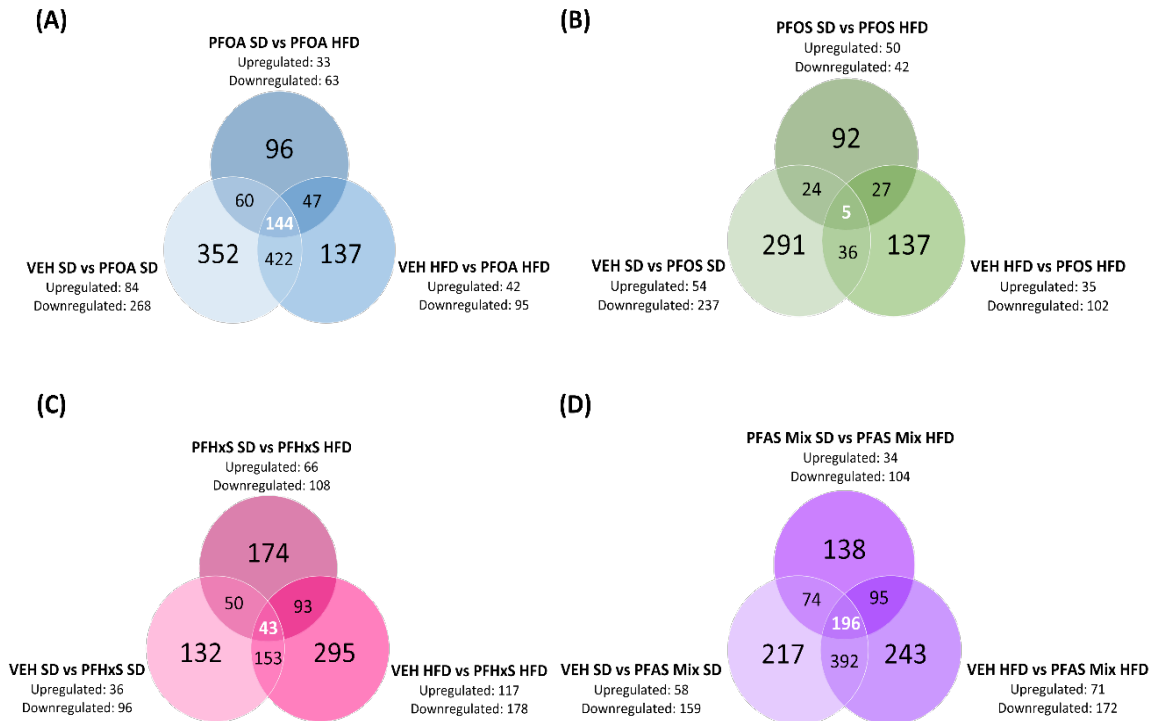

**Figure S3. Individual and shared proteins within treatment comparisons - focusing on diet and PFAS-based effects.** The Venn diagrams were created by Log2 transforming the treatment comparison fold changes of PND21 pups, and then further filtering out all insignificant Log2FC values ( $p < 0.05$ ). Each Venn diagram aims to elucidate both exclusive and commonly expressed significant proteins between comparisons. There is a focus on investigating both diet and structure-based effects between PFAS treatment\* versus VEH (both SD and HFD) and PFAS treatment\* HFD versus PFAS treatment\* (A) PFOA, (B) PFOS, (C) PFHxS, and (D) PFAS Mixture.

\*PFAS Treatments include: PFOA, PFOS, PFHxS, and PFAS Mixture
